# Supplementary material for: Kinetic modeling of the adsorption and desorption of CO2 on α-Fe2O3
Source: Royal Society of Chemistry journal article supplement (doi:10.1039/c5cp04671h), 2015-01-01
Supplement: c5cp04671h1.pdf [file c5cp04671h1.pdf]

## Supporting information

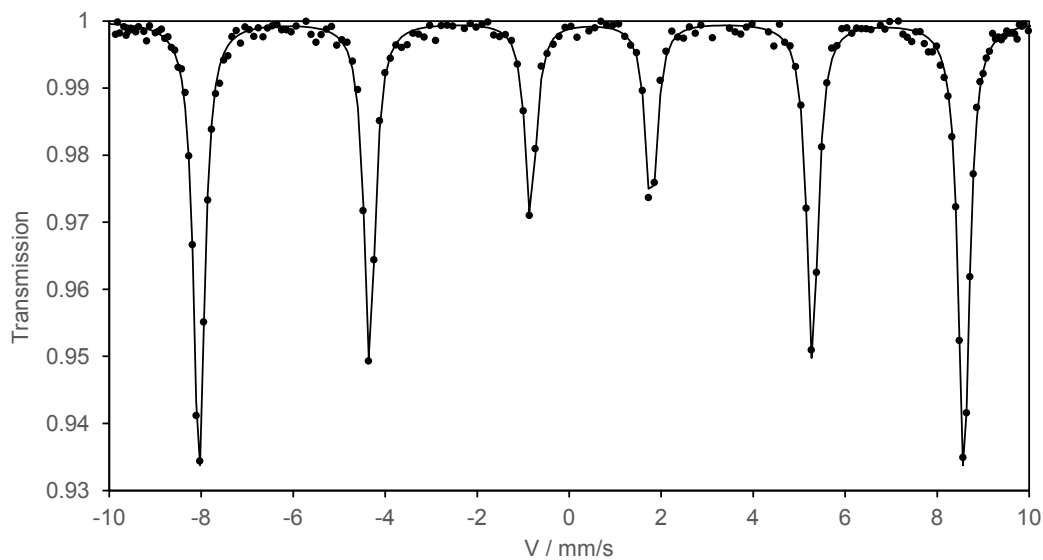

## Moessbauer spectrum of the $\alpha$ - $\text{Fe}_2\text{O}_3$ sample

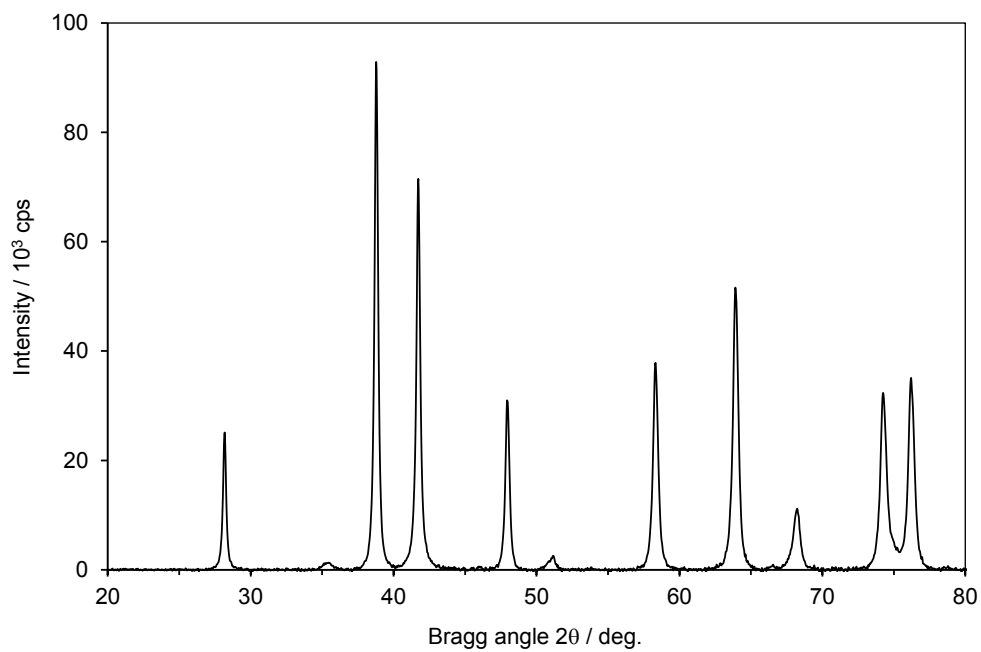

## XRD pattern of the $\alpha$ - $\text{Fe}_2\text{O}_3$ sample
